# Supplementary material
Source: PubMed Central journal article supplement (PMC5034734)
Supplement: NIHMS816372-supplement-01.pdf [file NIHMS816372-supplement-01.pdf]

## DATA AND ANALYSES

### Comparison 1. Norethisterone 350 µg OC versus levonorgestrel 30 µg OC

| Outcome or subgroup title             | No. of studies | No. of participants | Statistical method                  | Effect size        |
|---------------------------------------|----------------|---------------------|-------------------------------------|--------------------|
| 1 Mean weight change (kg) at 6 months | 1              | 39                  | Mean Difference (IV, Fixed, 95% CI) | -0.6 [-1.76, 0.56] |

### Comparison 2. Desogestrel (DSG) OC versus control (no hormonal method)

| Outcome or subgroup title                           | No. of studies | No. of participants | Statistical method                  | Effect size          |
|-----------------------------------------------------|----------------|---------------------|-------------------------------------|----------------------|
| 1 Mean change in weight (kg) at 1 year              | 1              | 68                  | Mean Difference (IV, Fixed, 95% CI) | 0.5 [-1.28, 2.28]    |
| 2 Mean change in BMI (kg/m <sup>2</sup> ) at 1 year | 1              | 68                  | Mean Difference (IV, Fixed, 95% CI) | 0.0 [-0.62, 0.62]    |
| 3 Mean change in fat mass (%) at 1 year             | 1              | 68                  | Mean Difference (IV, Fixed, 95% CI) | 3.30 [2.08, 4.52]    |
| 4 Mean change in fat free mass (%) at 1 year        | 1              | 68                  | Mean Difference (IV, Fixed, 95% CI) | -3.30 [-4.52, -2.08] |

### Comparison 3. DMPA 150 mg/mL versus COC

| Outcome or subgroup title                    | No. of studies | No. of participants | Statistical method                  | Effect size         |
|----------------------------------------------|----------------|---------------------|-------------------------------------|---------------------|
| 1 Weight gain ≥ 1 kg at month 6              | 1              | 31                  | Odds Ratio (M-H, Fixed, 95% CI)     | 0.39 [0.09, 1.67]   |
| 2 Weight gain ≥ 1 kg at month 12             | 1              | 26                  | Odds Ratio (M-H, Fixed, 95% CI)     | 0.44 [0.08, 2.39]   |
| 3 Weight loss ≥ 1 kg at month 6              | 1              | 31                  | Odds Ratio (M-H, Fixed, 95% CI)     | 9.24 [0.44, 195.69] |
| 4 Weight loss ≥ 1 kg at month 12             | 1              | 26                  | Odds Ratio (M-H, Fixed, 95% CI)     | 1.83 [0.15, 23.15]  |
| 5 Mean weight change (kg) at 6 months        | 1              | 142                 | Mean Difference (IV, Fixed, 95% CI) | -0.50 [-2.26, 1.26] |
| 6 Mean weight change (kg) at 12 months       | 1              | 81                  | Mean Difference (IV, Fixed, 95% CI) | 0.7 [-1.92, 3.32]   |
| 7 Mean percentage weight change at 6 months  | 1              | 142                 | Mean Difference (IV, Fixed, 95% CI) | -0.7 [-3.10, 1.70]  |
| 8 Mean percentage weight change at 12 months | 1              | 81                  | Mean Difference (IV, Fixed, 95% CI) | 0.0 [-3.79, 3.79]   |

**Comparison 4. DMPA 150 mg/mL versus MPA + E<sub>2</sub>C**

| Outcome or subgroup title                    | No. of studies | No. of participants | Statistical method                  | Effect size         |
|----------------------------------------------|----------------|---------------------|-------------------------------------|---------------------|
| 1 Mean weight change (kg) at 6 months        | 1              | 70                  | Mean Difference (IV, Fixed, 95% CI) | -0.6 [-3.05, 1.85]  |
| 2 Mean weight change (kg) at 12 months       | 1              | 46                  | Mean Difference (IV, Fixed, 95% CI) | -1.3 [-6.37, 3.77]  |
| 3 Mean percentage weight change at 6 months  | 1              | 70                  | Mean Difference (IV, Fixed, 95% CI) | -0.60 [-4.04, 2.84] |
| 4 Mean percentage weight change at 12 months | 1              | 46                  | Mean Difference (IV, Fixed, 95% CI) | -0.70 [-7.58, 6.18] |

**Comparison 5. DMPA 150 mg/mL + placebo versus DMPA 150 mg/mL + E<sub>2</sub>C**

| Outcome or subgroup title                       | No. of studies | No. of participants | Statistical method                  | Effect size         |
|-------------------------------------------------|----------------|---------------------|-------------------------------------|---------------------|
| 1 Mean change in total body fat (%) at 6 months | 1              | 15                  | Mean Difference (IV, Fixed, 95% CI) | 7.50 [-0.47, 15.47] |
| 2 Mean change in lean body mass (%) at 6 months | 1              | 15                  | Mean Difference (IV, Fixed, 95% CI) | -2.2 [-3.00, 0.60]  |

**Comparison 6. DMPA 150 mg/mL versus DMPA 450 mg/mL**

| Outcome or subgroup title             | No. of studies | No. of participants | Statistical method                  | Effect size        |
|---------------------------------------|----------------|---------------------|-------------------------------------|--------------------|
| 1 Mean weight change (kg) at 6 months | 1              | 651                 | Mean Difference (IV, Fixed, 95% CI) | 0.01 [-0.48, 0.50] |

**Comparison 7. DMPA 150 mg/mL initiation after pregnancy: interval ( $\geq 20$  weeks) versus postpartum (5 to 8 weeks)**

| Outcome or subgroup title          | No. of studies | No. of participants | Statistical method                  | Effect size        |
|------------------------------------|----------------|---------------------|-------------------------------------|--------------------|
| 1 Mean weight gain (lb) at 1 year  | 1              | 172                 | Mean Difference (IV, Fixed, 95% CI) | 2.30 [-0.94, 5.54] |
| 2 Mean weight gain (lb) at 2 years | 1              | 64                  | Mean Difference (IV, Fixed, 95% CI) | 1.60 [-4.79, 7.99] |

**Comparison 8. DMPA-IM 150 mg versus DMPA-SC 104 mg**

| Outcome or subgroup title              | No. of studies | No. of participants | Statistical method                  | Effect size        |
|----------------------------------------|----------------|---------------------|-------------------------------------|--------------------|
| 1 Mean weight change (kg) at 36 months | 1              | 121                 | Mean Difference (IV, Fixed, 95% CI) | 1.30 [-1.78, 4.38] |

**Comparison 9. DMPA 150 mg/mL versus NET-EN 200 mg (60-day intervals)**

| Outcome or subgroup title              | No. of studies | No. of participants | Statistical method                  | Effect size        |
|----------------------------------------|----------------|---------------------|-------------------------------------|--------------------|
| 1 Mean weight change (kg) at 12 months | 1              | 1162                | Mean Difference (IV, Fixed, 95% CI) | 0.20 [-0.63, 1.03] |
| 2 Mean weight change (kg) at 24 months | 1              | 604                 | Mean Difference (IV, Fixed, 95% CI) | 0.0 [-1.39, 1.39]  |
| 3 Mean weight change at 1 year         | 1              | 201                 | Mean Difference (IV, Fixed, 95% CI) | 0.80 [-0.10, 1.70] |

**Comparison 10. NET-EN 200 mg: 60-day intervals versus 3 intervals of 60 days then 84-day intervals**

| Outcome or subgroup title              | No. of studies | No. of participants | Statistical method                  | Effect size         |
|----------------------------------------|----------------|---------------------|-------------------------------------|---------------------|
| 1 Mean weight change (kg) at 12 months | 1              | 822                 | Mean Difference (IV, Fixed, 95% CI) | 0.0 [-0.71, 0.71]   |
| 2 Mean weight change (kg) at 24 months | 1              | 453                 | Mean Difference (IV, Fixed, 95% CI) | -0.10 [-1.35, 1.15] |

**Comparison 11. DMPA 150 mg/mL versus Cu IUC**

| Outcome or subgroup title                            | No. of studies | No. of participants | Statistical method                  | Effect size         |
|------------------------------------------------------|----------------|---------------------|-------------------------------------|---------------------|
| 1 Mean weight change (kg) at 10 years                | 1              | 100                 | Mean Difference (IV, Fixed, 95% CI) | -0.30 [-0.83, 0.23] |
| 2 Mean weight change (kg) at 1 year by baseline BMI  | 1              | 758                 | Mean Difference (IV, Fixed, 95% CI) | 2.28 [1.79, 2.77]   |
| 2.1 BMI < 25 kg/m <sup>2</sup>                       | 1              | 452                 | Mean Difference (IV, Fixed, 95% CI) | 2.5 [1.90, 3.10]    |
| 2.2 BMI 25 to 29.9 kg/m <sup>2</sup>                 | 1              | 218                 | Mean Difference (IV, Fixed, 95% CI) | 2.10 [1.16, 3.04]   |
| 2.3 BMI ≥ 30 kg/m <sup>2</sup>                       | 1              | 88                  | Mean Difference (IV, Fixed, 95% CI) | 0.7 [-1.26, 2.66]   |
| 3 Mean weight change (kg) at 2 years by baseline BMI | 1              | 758                 | Mean Difference (IV, Fixed, 95% CI) | 2.71 [2.12, 3.30]   |

|                                                      |   |     |                                     |                    |
|------------------------------------------------------|---|-----|-------------------------------------|--------------------|
| 3.1 BMI < 25 kg/m <sup>2</sup>                       | 1 | 452 | Mean Difference (IV, Fixed, 95% CI) | 2.7 [2.02, 3.38]   |
| 3.2 BMI 25 to 29.9 kg/m <sup>2</sup>                 | 1 | 218 | Mean Difference (IV, Fixed, 95% CI) | 3.0 [1.73, 4.27]   |
| 3.3 BMI ≥ 30 kg/m <sup>2</sup>                       | 1 | 88  | Mean Difference (IV, Fixed, 95% CI) | 1.5 [-1.33, 4.33]  |
| 4 Mean weight change (kg) at 3 years by baseline BMI | 1 | 758 | Mean Difference (IV, Fixed, 95% CI) | 3.17 [2.51, 3.83]  |
| 4.1 BMI < 25 kg/m <sup>2</sup>                       | 1 | 452 | Mean Difference (IV, Fixed, 95% CI) | 3.3 [2.52, 4.08]   |
| 4.2 BMI 25 to 29.9 kg/m <sup>2</sup>                 | 1 | 218 | Mean Difference (IV, Fixed, 95% CI) | 3.20 [1.82, 4.58]  |
| 4.3 BMI ≥ 30 kg/m <sup>2</sup>                       | 1 | 88  | Mean Difference (IV, Fixed, 95% CI) | 1.30 [-1.56, 4.16] |
| 5 Mean weight change (kg) by year                    |   |     | Other data                          | No numeric data    |
| 6 Mean changes in body composition by 12 months      |   |     | Other data                          | No numeric data    |

### Comparison 12. DMPA, ENG implant, or LNG-IUC versus Cu IUC

| Outcome or subgroup title             | No. of studies | No. of participants | Statistical method | Effect size     |
|---------------------------------------|----------------|---------------------|--------------------|-----------------|
| 1 Mean weight change (kg) at 1 year   |                |                     | Other data         | No numeric data |
| 2 Mean weight change (kg) at 4 years  |                |                     | Other data         | No numeric data |
| 3 Mean weight change (kg) at 10 years |                |                     | Other data         | No numeric data |
| 4 Weight change (kg) at 12 months     |                |                     | Other data         | No numeric data |

### Comparison 13. DMPA 150 mg/mL versus no hormonal method

| Outcome or subgroup title                                         | No. of studies | No. of participants | Statistical method                  | Effect size         |
|-------------------------------------------------------------------|----------------|---------------------|-------------------------------------|---------------------|
| 1 Mean change in total body fat (%) at 6 months                   | 1              | 26                  | Mean Difference (IV, Fixed, 95% CI) | 11.0 [2.64, 19.36]  |
| 2 Mean change in lean body mass (%) at 6 months                   | 1              | 26                  | Mean Difference (IV, Fixed, 95% CI) | -4.0 [-6.93, -1.07] |
| 3 Mean change in weight (lb) at 12 months postpartum              | 1              | 47                  | Mean Difference (IV, Fixed, 95% CI) | 1.54 [-8.39, 11.47] |
| 4 Mean change in BMI (kg/m <sup>2</sup> ) at 12 months postpartum | 1              | 47                  | Mean Difference (IV, Fixed, 95% CI) | 0.32 [-1.40, 2.04]  |
| 5 Mean change in body fat (%) at 12 months postpartum             | 1              | 47                  | Mean Difference (IV, Fixed, 95% CI) | 0.98 [-2.39, 4.35]  |

#### Comparison 14. Norplant versus non-hormonal IUC

| Outcome or subgroup title             | No. of studies | No. of participants | Statistical method                  | Effect size        |
|---------------------------------------|----------------|---------------------|-------------------------------------|--------------------|
| 1 Mean weight change (kg) at 6 months | 1              | 99                  | Mean Difference (IV, Fixed, 95% CI) | 0.47 [0.29, 0.65]  |
| 2 Mean weight change (kg) at 1 year   | 1              | 324                 | Mean Difference (IV, Fixed, 95% CI) | 1.1 [0.36, 1.84]   |
| 3 Mean weight change (kg) at 3 years  | 1              | 190                 | Mean Difference (IV, Fixed, 95% CI) | 0.90 [-0.39, 2.19] |

#### Comparison 15. Norplant versus barrier, 'local', or no contraceptive method

| Outcome or subgroup title             | No. of studies | No. of participants | Statistical method                  | Effect size       |
|---------------------------------------|----------------|---------------------|-------------------------------------|-------------------|
| 1 Mean weight change (kg) at 6 months | 1              | 97                  | Mean Difference (IV, Fixed, 95% CI) | 0.74 [0.52, 0.96] |

#### Comparison 16. Norplant versus DMPA 150 mg/mL

| Outcome or subgroup title           | No. of studies | No. of participants | Statistical method                  | Effect size         |
|-------------------------------------|----------------|---------------------|-------------------------------------|---------------------|
| 1 Mean weight change (kg) at 1 year | 1              | 100                 | Mean Difference (IV, Fixed, 95% CI) | -0.87 [-1.86, 0.12] |

#### Comparison 17. Norplant versus 2-rod LNG

| Outcome or subgroup title            | No. of studies | No. of participants | Statistical method                  | Effect size        |
|--------------------------------------|----------------|---------------------|-------------------------------------|--------------------|
| 1 Mean weight change (kg) at 1 year  | 1              | 1196                | Mean Difference (IV, Fixed, 95% CI) | 0.09 [-0.33, 0.51] |
| 2 Mean weight change (kg) at 3 years | 1              | 922                 | Mean Difference (IV, Fixed, 95% CI) | 0.0 [-0.60, 0.60]  |
| 3 Mean weight change (kg) at 5 years | 1              | 614                 | Mean Difference (IV, Fixed, 95% CI) | 0.60 [-0.13, 1.33] |

### Comparison 18. Norplant versus COC

---

| Outcome or subgroup title           | No. of studies | No. of participants | Statistical method                  | Effect size       |
|-------------------------------------|----------------|---------------------|-------------------------------------|-------------------|
| 1 Mean weight change (kg) at 1 year | 1              | 226                 | Mean Difference (IV, Fixed, 95% CI) | 1.1 [-0.13, 2.33] |

---

### Comparison 19. LNG-IUC versus no hormonal contraceptive

---

| Outcome or subgroup title                           | No. of studies | No. of participants | Statistical method                  | Effect size         |
|-----------------------------------------------------|----------------|---------------------|-------------------------------------|---------------------|
| 1 Mean changes in body composition by 12 months     |                |                     | Other data                          | No numeric data     |
| 2 Mean change in weight (kg) at 1 year              | 1              | 60                  | Mean Difference (IV, Fixed, 95% CI) | 0.8 [-0.75, 2.35]   |
| 3 Mean change in BMI (kg/m <sup>2</sup> ) at 1 year | 1              | 60                  | Mean Difference (IV, Fixed, 95% CI) | -0.3 [-0.75, 0.15]  |
| 4 Mean change in fat mass (%) at 1 year             | 1              | 60                  | Mean Difference (IV, Fixed, 95% CI) | 1.6 [0.45, 2.75]    |
| 5 Mean change in fat free mass (%) at 1 year        | 1              | 60                  | Mean Difference (IV, Fixed, 95% CI) | -1.6 [-2.75, -0.45] |

---
